# Supplementary material for: Eukaryotic translation elongation factor-1 alpha is associated with a specific subset of mRNAs in Trypanosoma cruzi
Source: PubMed Central journal article supplement (PMC4436862; doi:10.1186/s12866-015-0436-2), 2015-05-19
Supplement: 12866_2015_436_MOESM1_ESM.pdf [file 12866_2015_436_MOESM1_ESM.pdf]

| Feature ID       | Product                                                                                                     | Baggerley's test: EPI EF1a vs CT EF1a normalized values - Weighted proportions fold change | Baggerley's test: EPI EF1a vs CT EF1a normalized values - Bonferroni | Baggerley's test: EPI EF1a vs CT EF1a normalized values - FDR p-value correction | EPI EF1a - Normalized means | CT EF1a - Normalized means |
|------------------|-------------------------------------------------------------------------------------------------------------|--------------------------------------------------------------------------------------------|----------------------------------------------------------------------|----------------------------------------------------------------------------------|-----------------------------|----------------------------|
| TcCLB.510785.10  | hypothetical protein                                                                                        | -10.639                                                                                    | 0.00%                                                                | 0.00%                                                                            | 380.168                     | 35.732                     |
| TcCLB.507951.215 | hypothetical protein, conserved                                                                             | -5.165                                                                                     | 0.00%                                                                | 0.00%                                                                            | 315.504                     | 61.090                     |
| TcCLB.508681.31  | hypothetical protein                                                                                        | -6.976                                                                                     | 0.00%                                                                | 0.00%                                                                            | 282.086                     | 40.437                     |
| TcCLB.508233.60  | heat shock protein 100 (clp protein), putative                                                              | -5.168                                                                                     | 1.23%                                                                | 0.00%                                                                            | 224.143                     | 43.369                     |
| TcCLB.511211.120 | activated protein kinase C receptor, putative, guanine nucleotide-binding protein beta subunit-like protein | -4.117                                                                                     | 0.63%                                                                | 0.00%                                                                            | 219.967                     | 53.430                     |
| TcCLB.479517.30  | hypothetical protein                                                                                        | -7.190                                                                                     | 0.17%                                                                | 0.00%                                                                            | 212.758                     | 29.591                     |
| TcCLB.510093.10  | ATPase, putative                                                                                            | ∞                                                                                          | 0.00%                                                                | 0.00%                                                                            | 166.40                      | 0                          |
| TcCLB.511869.9   | dynein heavy chain, putative                                                                                | -4.538                                                                                     | 0.03%                                                                | 0.00%                                                                            | 157.21                      | 34.643                     |
| TcCLB.511233.59  | hypothetical protein, conserved                                                                             | ∞                                                                                          | 0.00%                                                                | 0.00%                                                                            | 138.25                      | 0                          |
| TcCLB.506825.200 | hypothetical protein                                                                                        | -6.986                                                                                     | 0.00%                                                                | 0.00%                                                                            | 136.40                      | 19.524                     |
| TcCLB.506401.12  | protein kinase domain, putative                                                                             | ∞                                                                                          | 0.00%                                                                | 0.00%                                                                            | 119.40                      | 0                          |
| TcCLB.508409.9   | 26S proteasome regulatory non-ATPase subunit, putative                                                      | -5.920                                                                                     | 0.01%                                                                | 0.00%                                                                            | 119.13                      | 20.123                     |
| TcCLB.510759.200 | hypothetical protein, conserved                                                                             | -9.929                                                                                     | 0.00%                                                                | 0.00%                                                                            | 117.77                      | 11.861                     |
| TcCLB.509901.160 | hypothetical protein, conserved                                                                             | -4.306                                                                                     | 0.00%                                                                | 0.00%                                                                            | 114.84                      | 26.673                     |
| TcCLB.510889.80  | serine/threonine protein phosphatase, putative                                                              | -5.672                                                                                     | 0.00%                                                                | 0.00%                                                                            | 104.62                      | 18.446                     |
| TcCLB.508873.210 | mucin-associated surface protein (MASP), putative                                                           | ∞                                                                                          | 0.00%                                                                | 0.00%                                                                            | 103.02                      | 0                          |
| TcCLB.506247.190 | nuclear lim interactor-interacting factor, putative                                                         | ∞                                                                                          | 0.45%                                                                | 0.00%                                                                            | 98.54                       | 0                          |
| TcCLB.505997.21  | N-acetyltransferase complex ARD1 subunit (pseudogene), putative                                             | ∞                                                                                          | 0.00%                                                                | 0.00%                                                                            | 98.01                       | 0                          |
| TcCLB.503415.10  | hypothetical protein (pseudogene)                                                                           | -9.215                                                                                     | 0.00%                                                                | 0.00%                                                                            | 94.50                       | 10.255                     |
| TcCLB.511021.60  | hypothetical protein, conserved                                                                             | -7.431                                                                                     | 0.00%                                                                | 0.00%                                                                            | 94.24                       | 12.682                     |
| TcCLB.510439.61  | heat shock 70 kDa protein, putative                                                                         | -5.968                                                                                     | 0.00%                                                                | 0.00%                                                                            | 91.89                       | 15.397                     |
| TcCLB.419169.20  | ribosomal RNA large subunit beta, 5' partial                                                                | ∞                                                                                          | 0.00%                                                                | 0.00%                                                                            | 91.63                       | 0                          |
| TcCLB.509463.41  | retrotransposon hot spot (RHS) protein, putative                                                            | ∞                                                                                          | 0.00%                                                                | 0.00%                                                                            | 91.53                       | 0                          |
| TcCLB.509033.60  | hypothetical protein, conserved                                                                             | ∞                                                                                          | 0.25%                                                                | 0.00%                                                                            | 90.12                       | 0                          |
| TcCLB.509259.126 | hypothetical protein                                                                                        | ∞                                                                                          | 0.00%                                                                | 0.00%                                                                            | 90.05                       | 0                          |

|                  |                                                                         |        |       |       |       |        |
|------------------|-------------------------------------------------------------------------|--------|-------|-------|-------|--------|
| TcCLB.509911.30  | hypothetical protein                                                    | -4.651 | 0.00% | 0.00% | 89.11 | 19.162 |
| TcCLB.505939.10  | hypothetical protein                                                    | ∞      | 0.03% | 0.00% | 89.00 | 0      |
| TcCLB.508799.250 | hypothetical protein, conserved                                         | -5.627 | 0.00% | 0.00% | 86.05 | 15.293 |
| TcCLB.510687.149 | coatomer alpha subunit, putative                                        | ∞      | 0.00% | 0.00% | 86.01 | 0      |
| TcCLB.503943.10  | putative                                                                | -4.023 | 0.00% | 0.00% | 85.28 | 21.199 |
| TcCLB.511509.30  | protein kinase, putative                                                | -4.089 | 0.00% | 0.00% | 83.07 | 20.315 |
| TcCLB.511285.120 | putative                                                                | -9.046 | 0.00% | 0.00% | 81.45 | 9.004  |
| TcCLB.506959.20  | hypothetical protein, conserved                                         | -4.078 | 0.00% | 0.00% | 80.17 | 19.659 |
| TcCLB.511427.19  | hypothetical protein, conserved                                         | ∞      | 0.00% | 0.00% | 76.76 | 0      |
| TcCLB.511773.30  | hypothetical protein                                                    | ∞      | 0.00% | 0.00% | 76.12 | 0      |
| TcCLB.509165.10  | trans-sialidase (pseudogene), putative                                  | -9.543 | 0.00% | 0.00% | 75.30 | 7.891  |
| TcCLB.511771.199 | hypothetical protein                                                    | ∞      | 0.00% | 0.00% | 74.80 | 0      |
| TcCLB.420293.50  | trans-sialidase (pseudogene), putative                                  | ∞      | 0.00% | 0.00% | 73.10 | 0      |
| TcCLB.504423.15  | hypothetical protein, conserved                                         | ∞      | 0.00% | 0.00% | 72.66 | 0      |
| TcCLB.507949.4   | putative                                                                | ∞      | 0.00% | 0.00% | 72.04 | 0      |
| TcCLB.510095.80  | hypothetical protein                                                    | ∞      | 0.00% | 0.00% | 71.67 | 0      |
| TcCLB.506355.80  | flagellum transition zone component, putative                           | -4.861 | 0.00% | 0.00% | 71.27 | 14.662 |
| TcCLB.426799.9   | hypothetical protein, conserved                                         | ∞      | 0.02% | 0.00% | 68.67 | 0      |
| TcCLB.506993.190 | hypothetical protein                                                    | ∞      | 0.00% | 0.00% | 68.10 | 0      |
| TcCLB.511581.20  | fatty acyl CoA syntetase 1                                              | ∞      | 0.00% | 0.00% | 67.84 | 0      |
| TcCLB.507801.19  | dynein heavy chain, putative                                            | ∞      | 0.00% | 0.00% | 67.74 | 0      |
| TcCLB.511603.40  | hypothetical protein                                                    | ∞      | 0.00% | 0.00% | 66.89 | 0      |
| TcCLB.503717.15  | hypothetical protein                                                    | ∞      | 0.03% | 0.00% | 66.53 | 0      |
| TcCLB.507887.20  | ubiquitin hydrolase, putative, cysteine peptidase, Clan CA, family C19, | -5.895 | 0.00% | 0.00% | 66.28 | 11.243 |
| TcCLB.506529.324 | hypothetical protein, conserved                                         | ∞      | 0.00% | 0.00% | 65.25 | 0      |
| TcCLB.504085.30  | RNA-binding protein, putative                                           | ∞      | 0.49% | 0.00% | 64.15 | 0      |
| TcCLB.506925.70  | epsin, putative                                                         | ∞      | 0.33% | 0.00% | 63.48 | 0      |
| TcCLB.506317.20  | hypothetical protein, conserved                                         | -6.407 | 0.00% | 0.00% | 63.25 | 9.872  |
| TcCLB.508235.10  | hypothetical protein, conserved (pseudogene)                            | ∞      | 0.24% | 0.00% | 62.79 | 0      |
| TcCLB.508797.29  | hypothetical protein, conserved                                         | ∞      | 0.01% | 0.00% | 62.19 | 0      |
| TcCLB.506245.302 | mucin-associated surface protein (MASP), putative                       | ∞      | 0.36% | 0.00% | 62.01 | 0      |
| TcCLB.504123.50  | hypothetical protein, conserved (pseudogene)                            | -6.686 | 0.00% | 0.00% | 61.17 | 9.149  |
| TcCLB.507357.20  | hypothetical protein                                                    | ∞      | 0.00% | 0.00% | 60.21 | 0      |
| TcCLB.503463.30  | protein kinase, putative                                                | -9.177 | 0.12% | 0.00% | 59.59 | 6.493  |
| TcCLB.509259.111 | N-acetyltransferase complex ARD1 subunit (pseudogene), putative         | ∞      | 0.00% | 0.00% | 59.38 | 0      |
| TcCLB.511283.210 | hypothetical protein, conserved                                         | -5.879 | 0.01% | 0.00% | 59.33 | 10.091 |
| TcCLB.460197.10  | cysteine peptidase (pseudogene), putative                               | ∞      | 0.00% | 0.00% | 59.12 | 0      |
| TcCLB.511727.190 | hypothetical protein, conserved                                         | ∞      | 0.00% | 0.00% | 58.68 | 0      |
| TcCLB.511819.30  | hypothetical protein, conserved                                         | ∞      | 0.00% | 0.00% | 58.47 | 0      |
| TcCLB.506885.10  | glycosyl transferase, putative                                          | -4.851 | 0.00% | 0.00% | 58.14 | 11.986 |

|                  |                                                                             |        |       |       |       |        |
|------------------|-----------------------------------------------------------------------------|--------|-------|-------|-------|--------|
| TcCLB.507053.110 | hypothetical protein, conserved                                             | -7.431 | 0.00% | 0.00% | 58.00 | 7.804  |
| TcCLB.511283.194 | hypothetical protein, conserved                                             | ∞      | 0.00% | 0.00% | 56.83 | 0      |
| TcCLB.503827.94  | chitin binding-like protein (pseudogene), putative                          | ∞      | 0.00% | 0.00% | 56.38 | 0      |
| TcCLB.509065.160 | eukaryotic translation initiation factor 3 subunit 7-like protein, putative | -4.892 | 0.55% | 0.00% | 55.25 | 11.295 |
| TcCLB.508043.20  | metallo-beta-lactamase-like protein, putative                               | -4.016 | 0.00% | 0.00% | 54.71 | 13.624 |
| TcCLB.511021.99  | hypothetical protein, conserved                                             | ∞      | 0.00% | 0.00% | 53.72 | 0      |
| TcCLB.508799.140 | transcription modulator/accessory protein, putative                         | ∞      | 0.00% | 0.00% | 53.18 | 0      |
| TcCLB.507641.239 | hypothetical protein, conserved                                             | ∞      | 0.00% | 0.00% | 52.43 | 0      |
| TcCLB.506595.140 | hypothetical protein                                                        | ∞      | 0.62% | 0.00% | 52.37 | 0      |
| TcCLB.438147.9   | hypothetical protein, conserved                                             | ∞      | 0.00% | 0.00% | 52.27 | 0      |
| TcCLB.504045.5   | hypothetical protein, conserved                                             | ∞      | 0.03% | 0.00% | 51.45 | 0      |
| TcCLB.511277.130 | hypothetical protein, conserved                                             | -4.185 | 0.00% | 0.00% | 51.35 | 12.271 |
| TcCLB.506297.230 | hypothetical protein, conserved                                             | -5.258 | 0.00% | 0.00% | 51.33 | 9.762  |
| TcCLB.511803.30  | hypothetical protein, conserved                                             | ∞      | 0.00% | 0.00% | 51.13 | 0      |
| TcCLB.509317.80  | hypothetical protein, conserved                                             | ∞      | 0.00% | 0.00% | 50.91 | 0      |
| TcCLB.511365.80  | mitochondrial carrier protein, putative                                     | ∞      | 0.00% | 0.00% | 50.72 | 0      |
| TcCLB.506337.190 | hypothetical protein, conserved                                             | -4.012 | 0.00% | 0.00% | 50.66 | 12.625 |
| TcCLB.506503.50  | hypothetical protein, conserved                                             | ∞      | 0.00% | 0.00% | 50.18 | 0      |
| TcCLB.508823.120 | ribosomal protein S20, putative                                             | ∞      | 0.00% | 0.00% | 50.16 | 0      |
