# Supplementary material for: Eukaryotic translation elongation factor-1 alpha is associated with a specific subset of mRNAs in Trypanosoma cruzi
Source: PubMed Central journal article supplement (PMC4436862; doi:10.1186/s12866-015-0436-2), 2015-05-19
Supplement: 12866_2015_436_MOESM2_ESM.pdf [file 12866_2015_436_MOESM2_ESM.pdf]

| Feature ID       | Product                                                                                                      | Baggerley<br>'s test:<br>STR EF1a<br>vs CT<br>EF1a<br>normalize<br>d values -<br>Weighted<br>proportio<br>ns fold<br>change | Baggerley<br>'s test:<br>STR EF1a<br>vs CT<br>EF1a<br>normalize<br>d values -<br>Bonferro<br>ni | Baggerley<br>'s test:<br>STR EF1a<br>vs CT<br>EF1a<br>normalize<br>d values -<br>FDR p-<br>value<br>correctio<br>n | CT EF1a -<br>Normaliz<br>ed means | STR EF1a -<br>Normaliz<br>ed means |
|------------------|--------------------------------------------------------------------------------------------------------------|-----------------------------------------------------------------------------------------------------------------------------|-------------------------------------------------------------------------------------------------|--------------------------------------------------------------------------------------------------------------------|-----------------------------------|------------------------------------|
| TcCLB.508111.30  | glutamate dehydrogenase, putative                                                                            | -15.67                                                                                                                      | 0.00%                                                                                           | 0.00%                                                                                                              | 95.37                             | 1494.80                            |
| TcCLB.511391.120 | glutamamyl carboxypeptidase,<br>putative,metallo-peptidase, clan MH,<br>family M18, putative                 | -4.25                                                                                                                       | 0.00%                                                                                           | 0.00%                                                                                                              | 345.20                            | 1467.15                            |
| TcCLB.508719.70  | hypothetical protein, conserved                                                                              | -7.59                                                                                                                       | 0.01%                                                                                           | 0.00%                                                                                                              | 97.96                             | 743.37                             |
| TcCLB.507715.10  | D-alanyl-glycyl endopeptidase-like protein,<br>putative,cysteine peptidase, Clan CA,<br>family C51, putative | -5.08                                                                                                                       | 3.17%                                                                                           | 0.00%                                                                                                              | 146.15                            | 742.74                             |
| TcCLB.504105.140 | enolase, putative                                                                                            | -6.52                                                                                                                       | 0.00%                                                                                           | 0.00%                                                                                                              | 105.70                            | 688.68                             |
| TcCLB.506925.319 | isocitrate dehydrogenase, putative                                                                           | -7.39                                                                                                                       | 0.07%                                                                                           | 0.00%                                                                                                              | 82.34                             | 608.42                             |
| TcCLB.511517.37  | reticulon domain protein, putative                                                                           | -5.70                                                                                                                       | 0.00%                                                                                           | 0.00%                                                                                                              | 91.15                             | 519.44                             |
| TcCLB.511277.60  | alcohol dehydrogenase, putative                                                                              | -8.92                                                                                                                       | 0.03%                                                                                           | 0.00%                                                                                                              | 57.83                             | 515.52                             |
| TcCLB.506621.30  | ribonucleoside-diphosphate reductase<br>small chain, putative                                                | -5.82                                                                                                                       | 0.00%                                                                                           | 0.00%                                                                                                              | 84.04                             | 488.99                             |
| TcCLB.504191.10  | sterol 24-c-methyltransferase, putative                                                                      | -10.05                                                                                                                      | 0.00%                                                                                           | 0.00%                                                                                                              | 47.34                             | 475.78                             |
| TcCLB.504153.280 | hypothetical protein, conserved                                                                              | -8.19                                                                                                                       | 0.00%                                                                                           | 0.00%                                                                                                              | 55.29                             | 453.10                             |
| TcCLB.504045.110 | urocanate hydratase, putative                                                                                | -6.48                                                                                                                       | 2.06%                                                                                           | 0.00%                                                                                                              | 67.24                             | 435.84                             |
| TcCLB.471709.10  | ribosomal RNA large subunit alpha, 3'<br>partial                                                             | ∞                                                                                                                           | 0.62%                                                                                           | 0.00%                                                                                                              | 0.00                              | 422.02                             |
| TcCLB.509353.60  | calmodulin, putative                                                                                         | -10.86                                                                                                                      | 0.00%                                                                                           | 0.00%                                                                                                              | 35.96                             | 390.55                             |
| TcCLB.509499.14  | tryparedoxin peroxidase, putative                                                                            | -15.58                                                                                                                      | 0.00%                                                                                           | 0.00%                                                                                                              | 25.03                             | 390.03                             |
| TcCLB.510293.40  | ubiquitin/ribosomal protein S27a, putative                                                                   | -14.07                                                                                                                      | 0.00%                                                                                           | 0.00%                                                                                                              | 26.80                             | 377.06                             |
| TcCLB.510661.250 | cystathione gamma lyase, putative                                                                            | -6.51                                                                                                                       | 0.18%                                                                                           | 0.00%                                                                                                              | 55.56                             | 361.93                             |
| TcCLB.508999.260 | calpain-like cysteine peptidase<br>(pseudogene), putative                                                    | -8.06                                                                                                                       | 0.00%                                                                                           | 0.00%                                                                                                              | 43.37                             | 349.47                             |
| TcCLB.436429.10  | ribosomal RNA large subunit beta, 3'<br>partial                                                              | -19.80                                                                                                                      | 0.00%                                                                                           | 0.00%                                                                                                              | 17.55                             | 347.60                             |
| TcCLB.507029.30  | heat shock 70 kDa protein, mitochondrial<br>precursor, putative                                              | -4.29                                                                                                                       | 0.00%                                                                                           | 0.00%                                                                                                              | 77.95                             | 334.00                             |
| TcCLB.510121.20  | hexokinase, putative                                                                                         | -8.04                                                                                                                       | 0.00%                                                                                           | 0.00%                                                                                                              | 36.11                             | 290.16                             |
| TcCLB.506789.280 | methylthioadenosine phosphorylase,<br>putative                                                               | -5.16                                                                                                                       | 0.00%                                                                                           | 0.00%                                                                                                              | 55.34                             | 285.66                             |
| TcCLB.506247.190 | nuclear lim interactor-interacting factor,<br>putative                                                       | ∞                                                                                                                           | 3.25%                                                                                           | 0.00%                                                                                                              | 0.00                              | 284.04                             |

|                  |                                                                                                                                 |        |       |       |       |        |
|------------------|---------------------------------------------------------------------------------------------------------------------------------|--------|-------|-------|-------|--------|
| TcCLB.510669.40  | hypothetical protein                                                                                                            | -6.14  | 0.00% | 0.00% | 45.82 | 281.26 |
| TcCLB.506321.290 | stress-induced protein sti1, putative                                                                                           | -4.59  | 0.09% | 0.00% | 61.20 | 280.64 |
| TcCLB.510535.100 | cysteine peptidase C (CPC), putative, cathepsin B-like protease, putative, CPC cysteine peptidase, clan CA, family C1, putative | -8.12  | 0.00% | 0.00% | 34.02 | 276.30 |
| TcCLB.509837.10  | hypothetical protein, conserved                                                                                                 | -9.33  | 0.53% | 0.00% | 28.06 | 261.84 |
| TcCLB.508099.40  | hypothetical protein                                                                                                            | ∞      | 0.00% | 0.00% | 0.00  | 259.21 |
| TcCLB.503975.50  | hypothetical protein, conserved                                                                                                 | -4.76  | 0.00% | 0.00% | 52.04 | 247.97 |
| TcCLB.509793.10  | kinetoplast DNA-associated protein, putative                                                                                    | ∞      | 4.11% | 0.00% | 0.00  | 237.57 |
| TcCLB.509569.100 | nucleoside phosphorylase, putative                                                                                              | -7.20  | 0.96% | 0.00% | 32.94 | 237.00 |
| TcCLB.509395.100 | cytochrome b-domain protein, putative                                                                                           | -11.52 | 0.00% | 0.00% | 19.73 | 227.27 |
| TcCLB.460197.10  | cysteine peptidase (pseudogene), putative                                                                                       | ∞      | 0.00% | 0.00% | 0.00  | 216.37 |
| TcCLB.511583.40  | tricarboxylate carrier, putative                                                                                                | -6.09  | 0.00% | 0.00% | 34.64 | 210.97 |
| TcCLB.507681.20  | succinyl-CoA ligase [GDP-forming] beta-chain, putative                                                                          | -5.17  | 0.00% | 0.00% | 40.68 | 210.38 |
| TcCLB.503939.110 | hypothetical protein, conserved                                                                                                 | -7.46  | 1.03% | 0.00% | 27.18 | 202.72 |
| TcCLB.510535.10  | hypothetical protein, conserved                                                                                                 | -26.44 | 0.00% | 0.00% | 7.62  | 201.40 |
| TcCLB.509791.189 | hypothetical protein, conserved                                                                                                 | -7.43  | 0.00% | 0.00% | 26.67 | 198.13 |
| TcCLB.509917.19  | retrotransposon hot spot (RHS) protein, putative                                                                                | -4.19  | 0.00% | 0.00% | 46.95 | 196.60 |
| TcCLB.509239.10  | fatty acid desaturase, putative                                                                                                 | -7.49  | 0.00% | 0.00% | 26.18 | 196.14 |
| TcCLB.509601.140 | hypothetical protein                                                                                                            | ∞      | 0.00% | 0.00% | 0.00  | 189.63 |
| TcCLB.503975.40  | hypothetical protein, conserved                                                                                                 | -13.34 | 0.03% | 0.00% | 14.08 | 187.87 |
| TcCLB.507305.20  | casein kinase, putative                                                                                                         | ∞      | 0.00% | 0.00% | 0.00  | 186.93 |
| TcCLB.503833.50  | hypothetical protein, conserved                                                                                                 | -5.49  | 0.00% | 0.00% | 33.62 | 184.69 |
| TcCLB.508971.40  | acetylornithine deacetylase-like, putative                                                                                      | -12.78 | 0.00% | 0.00% | 14.35 | 183.36 |
| TcCLB.506529.508 | glucose-6-phosphate isomerase, glycosomal, putative                                                                             | -4.86  | 0.00% | 0.00% | 37.32 | 181.47 |
| TcCLB.509167.140 | hypothetical protein, conserved                                                                                                 | -12.05 | 0.00% | 0.00% | 14.87 | 179.26 |
| TcCLB.510795.10  | tyrosine aminotransferase                                                                                                       | -4.12  | 1.31% | 0.00% | 40.87 | 168.60 |
| TcCLB.510301.20  | fructose-bisphosphate aldolase, glycosomal, putative                                                                            | ∞      | 0.00% | 0.00% | 0.00  | 165.88 |
| TcCLB.511239.49  | adenosine 5'-monophosphoramidase, putative                                                                                      | ∞      | 0.00% | 0.00% | 0.00  | 163.74 |
| TcCLB.507951.299 | hypothetical protein, conserved                                                                                                 | -10.28 | 2.57% | 0.00% | 15.84 | 162.76 |
| TcCLB.507787.100 | gamma-glutamylcysteine synthetase, putative                                                                                     | -9.87  | 0.01% | 0.00% | 16.37 | 161.63 |
| TcCLB.508301.20  | mitochondrial processing peptidase, beta subunit, putative, metallo-peptidase, Clan ME, Family M16, putative                    | ∞      | 1.19% | 0.00% | 0.00  | 151.95 |
| TcCLB.507165.30  | hypothetical protein, conserved                                                                                                 | ∞      | 4.11% | 0.00% | 0.00  | 146.20 |
| TcCLB.510121.50  | calmodulin, putative                                                                                                            | -4.72  | 0.00% | 0.00% | 30.38 | 143.48 |
| TcCLB.506241.170 | 40S ribosomal protein S6, putative                                                                                              | ∞      | 1.50% | 0.00% | 0.00  | 139.62 |
| TcCLB.509233.180 | ATPase beta subunit, putative                                                                                                   | -4.23  | 1.01% | 0.00% | 32.84 | 138.84 |

|                  |                                                                                                   |        |       |       |       |        |
|------------------|---------------------------------------------------------------------------------------------------|--------|-------|-------|-------|--------|
| TcCLB.511909.40  | succinate dehydrogenase flavoprotein, putative                                                    | -14.89 | 0.48% | 0.00% | 9.31  | 138.73 |
| TcCLB.510797.10  | 2-oxoglutarate dehydrogenase subunit, putative                                                    | -4.87  | 0.00% | 0.00% | 28.18 | 137.35 |
| TcCLB.508505.4   | hypothetical protein, conserved                                                                   | ∞      | 0.00% | 0.00% | 0.00  | 134.37 |
| TcCLB.508409.180 | hypothetical protein, conserved                                                                   | -7.53  | 0.00% | 0.00% | 17.22 | 129.56 |
| TcCLB.511801.60  | mitochondrial DEAD box protein, putative                                                          | -4.09  | 0.00% | 0.00% | 31.33 | 128.22 |
| TcCLB.506977.90  | proteasome regulatory non-ATPase subunit 5, putative,19S proteasome regulatory subunit, putative  | -5.07  | 0.00% | 0.00% | 23.62 | 119.70 |
| TcCLB.506441.20  | hypothetical protein, conserved                                                                   | -7.35  | 0.01% | 0.00% | 15.74 | 115.73 |
| TcCLB.503587.80  | mucin-associated surface protein (MASP, pseudogene), putative                                     | ∞      | 0.00% | 0.00% | 0.00  | 115.39 |
| TcCLB.506247.340 | hypothetical protein, conserved                                                                   | ∞      | 0.00% | 0.00% | 0.00  | 115.10 |
| TcCLB.511635.40  | protein tyrosine phosphatase, putative                                                            | -4.72  | 0.00% | 0.00% | 24.18 | 114.17 |
| TcCLB.506801.20  | mucin-like glycoprotein, putative                                                                 | -5.04  | 3.21% | 0.00% | 22.50 | 113.35 |
| TcCLB.504109.90  | ubiquitin carboxyl-terminal hydrolase, putative,cysteine peptidase, Clan CA, family C12, putative | -4.72  | 0.00% | 0.00% | 23.97 | 113.21 |
| TcCLB.511907.310 | hypothetical protein, conserved                                                                   | -5.38  | 0.00% | 0.00% | 20.51 | 110.38 |
| TcCLB.508859.40  | leucine-rich repeat protein (LRRP), putative                                                      | ∞      | 0.00% | 0.00% | 0.00  | 110.05 |
| TcCLB.503837.40  | hypothetical protein, conserved                                                                   | ∞      | 0.00% | 0.00% | 0.00  | 107.64 |
| TcCLB.504005.54  | hypothetical protein, conserved                                                                   | ∞      | 0.00% | 0.00% | 0.00  | 107.64 |
| TcCLB.511909.60  | hypothetical protein, conserved                                                                   | ∞      | 0.00% | 0.00% | 0.00  | 106.93 |
| TcCLB.507765.120 | hypothetical protein, conserved                                                                   | ∞      | 0.00% | 0.00% | 0.00  | 105.46 |
| TcCLB.508043.20  | metallo-beta-lactamase-like protein, putative                                                     | -7.43  | 0.00% | 0.00% | 13.62 | 101.20 |
| TcCLB.510421.250 | hypothetical protein, conserved                                                                   | -6.67  | 0.65% | 0.00% | 15.03 | 100.27 |
| TcCLB.511277.400 | UDP-galactose transporter, putative                                                               | ∞      | 0.00% | 0.00% | 0.00  | 97.31  |
| TcCLB.508643.20  | hypothetical protein, conserved                                                                   | ∞      | 0.00% | 0.00% | 0.00  | 94.79  |
| TcCLB.504105.20  | eukaryotic translation initiation factor 5, putative                                              | ∞      | 1.50% | 0.00% | 0.00  | 92.22  |
| TcCLB.509937.50  | hypothetical protein, conserved                                                                   | -4.47  | 0.16% | 0.00% | 20.56 | 91.91  |
| TcCLB.509029.80  | hypothetical protein                                                                              | -4.36  | 0.00% | 0.00% | 20.93 | 91.21  |
| TcCLB.506715.40  | hypothetical protein, conserved                                                                   | ∞      | 0.07% | 0.00% | 0.00  | 91.10  |
| TcCLB.508719.60  | kinetoplast DNA-associated protein, putative                                                      | ∞      | 0.00% | 0.00% | 0.00  | 90.82  |
| TcCLB.506263.30  | D-isomer specific 2-hydroxyacid dehydrogenase-protein, putative                                   | -5.51  | 3.47% | 0.00% | 16.37 | 90.19  |
| TcCLB.507951.270 | hypothetical protein, conserved                                                                   | -7.55  | 0.00% | 0.00% | 11.84 | 89.42  |
| TcCLB.511575.30  | hypothetical protein, conserved                                                                   | ∞      | 0.00% | 0.00% | 0.00  | 88.31  |
| TcCLB.506417.70  | hypothetical protein                                                                              | -4.09  | 0.00% | 0.00% | 20.58 | 84.24  |
| TcCLB.506725.20  | hypothetical protein, conserved                                                                   | -4.36  | 0.00% | 0.00% | 19.32 | 84.23  |
| TcCLB.506469.130 | hypothetical protein                                                                              | ∞      | 0.00% | 0.00% | 0.00  | 82.16  |
| TcCLB.510943.50  | delta-1-pyrroline-5-carboxylate dehydrogenase, putative                                           | -8.09  | 0.00% | 0.00% | 10.11 | 81.76  |

|                  |                                                                                        |       |       |       |       |       |
|------------------|----------------------------------------------------------------------------------------|-------|-------|-------|-------|-------|
| TcCLB.506727.100 | enoyl-CoA hydratase/isomerase family protein, putative                                 | ∞     | 0.00% | 0.00% | 0.00  | 81.30 |
| TcCLB.507093.260 | ABC transporter, putative                                                              | -9.38 | 0.06% | 0.00% | 8.58  | 80.47 |
| TcCLB.509331.180 | aldose 1-epimerase-like protein, putative                                              | -5.38 | 0.00% | 0.00% | 14.91 | 80.25 |
| TcCLB.510101.50  | lanosterol 14-alpha-demethylase, putative                                              | ∞     | 0.00% | 0.00% | 0.00  | 78.64 |
| TcCLB.506401.12  | protein kinase domain, putative                                                        | ∞     | 4.11% | 0.00% | 0.00  | 77.57 |
| TcCLB.509599.130 | serine/threonine protein kinase, putative                                              | ∞     | 0.00% | 0.00% | 0.00  | 77.53 |
| TcCLB.507275.40  | hypothetical protein, conserved                                                        | ∞     | 4.11% | 0.00% | 0.00  | 76.79 |
| TcCLB.510339.80  | hypothetical protein, conserved                                                        | ∞     | 4.11% | 0.00% | 0.00  | 75.65 |
| TcCLB.511165.109 | hypothetical protein, conserved                                                        | ∞     | 0.00% | 0.00% | 0.00  | 75.33 |
| TcCLB.509455.114 | hypothetical protein, conserved                                                        | ∞     | 0.00% | 0.00% | 0.00  | 75.20 |
| TcCLB.510027.20  | transporter, putative                                                                  | ∞     | 0.00% | 0.00% | 0.00  | 75.05 |
| TcCLB.510879.130 | hypothetical protein, conserved                                                        | -5.48 | 0.72% | 0.00% | 13.59 | 74.47 |
| TcCLB.510439.61  | heat shock 70 kDa protein, putative                                                    | -4.72 | 0.00% | 0.00% | 15.40 | 72.71 |
| TcCLB.506853.50  | 2-oxoisovalerate dehydrogenase alpha subunit, putative                                 | ∞     | 0.00% | 0.00% | 0.00  | 70.78 |
| TcCLB.503745.30  | ascorbate-dependent peroxidase, putative                                               | ∞     | 0.00% | 0.00% | 0.00  | 70.67 |
| TcCLB.511517.130 | hypothetical protein, conserved                                                        | ∞     | 0.00% | 0.00% | 0.00  | 70.46 |
| TcCLB.503555.30  | trypanothione reductase, putative                                                      | ∞     | 0.00% | 0.00% | 0.00  | 69.62 |
| TcCLB.506925.20  | hypothetical protein, conserved                                                        | -4.09 | 0.00% | 0.00% | 17.01 | 69.61 |
| TcCLB.510943.90  | hypothetical protein, conserved                                                        | ∞     | 0.00% | 0.00% | 0.00  | 68.38 |
| TcCLB.511531.30  | hypothetical protein, conserved                                                        | -6.80 | 0.00% | 0.00% | 10.06 | 68.36 |
| TcCLB.504149.150 | hypothetical protein, conserved                                                        | -4.75 | 0.10% | 0.00% | 14.38 | 68.35 |
| TcCLB.508045.70  | hypothetical protein, conserved                                                        | ∞     | 0.00% | 0.00% | 0.00  | 68.33 |
| TcCLB.511421.100 | hypothetical protein, conserved                                                        | ∞     | 0.00% | 0.00% | 0.00  | 68.10 |
| TcCLB.504037.10  | hypothetical protein, conserved                                                        | ∞     | 0.00% | 0.00% | 0.00  | 67.59 |
| TcCLB.506945.250 | hypothetical protein, conserved                                                        | ∞     | 2.00% | 0.00% | 0.00  | 66.55 |
| TcCLB.503525.4   | hypothetical protein, conserved                                                        | ∞     | 0.00% | 0.00% | 0.00  | 64.10 |
| TcCLB.508909.310 | hypothetical protein                                                                   | ∞     | 0.00% | 0.00% | 0.00  | 61.53 |
| TcCLB.504163.60  | hypothetical protein, conserved                                                        | ∞     | 0.00% | 0.00% | 0.00  | 61.19 |
| TcCLB.506363.80  | aminoacylase, putative,N-acyl-L-amino acid amidohydrolase, putative                    | ∞     | 0.00% | 0.00% | 0.00  | 61.19 |
| TcCLB.508719.30  | hypothetical protein, conserved                                                        | ∞     | 0.00% | 0.00% | 0.00  | 60.24 |
| TcCLB.507089.170 | hypothetical protein, conserved                                                        | ∞     | 0.00% | 0.00% | 0.00  | 58.09 |
| TcCLB.511807.110 | GMP synthase, putative,glutamine amidotransferase, putative                            | -6.67 | 1.11% | 0.00% | 8.63  | 57.60 |
| TcCLB.457251.10  | 3-oxo-5-alpha-steroid 4-dehydrogenase, putative                                        | ∞     | 4.11% | 0.00% | 0.00  | 57.59 |
| TcCLB.506789.200 | ubiquitin-conjugating enzyme, putative                                                 | -4.09 | 0.00% | 0.00% | 13.82 | 56.57 |
| TcCLB.506457.10  | methionine aminopeptidase 2, putative,metallo-peptidase, clan MG, family M24, putative | -4.72 | 0.00% | 0.00% | 11.94 | 56.37 |
| TcCLB.511269.50  | protein kinase A catalytic subunit, putative                                           | ∞     | 0.00% | 0.00% | 0.00  | 56.07 |
| TcCLB.504643.49  | hypothetical protein, conserved                                                        | ∞     | 2.00% | 0.00% | 0.00  | 54.77 |

|                 |                                 |          |       |       |      |       |
|-----------------|---------------------------------|----------|-------|-------|------|-------|
| TcCLB.510295.59 | hypothetical protein, conserved | $\infty$ | 0.00% | 0.00% | 0.00 | 54.41 |
| TcCLB.453917.9  | hypothetical protein, conserved | $\infty$ | 0.00% | 0.00% | 0.00 | 52.45 |
| TcCLB.506735.80 | hypothetical protein, conserved | $\infty$ | 0.00% | 0.00% | 0.00 | 52.35 |
| TcCLB.511439.70 | hypothetical protein, conserved | $\infty$ | 0.00% | 0.00% | 0.00 | 50.66 |
| TcCLB.509353.20 | hypothetical protein, conserved | $\infty$ | 4.11% | 0.00% | 0.00 | 50.18 |
